# Supplementary material
Source: PubMed Central journal article supplement (PMC2806714)
Supplement: 0912407107_pnas.200912407SI.pdf [file 0912407107_pnas.200912407SI.pdf]

# Supporting Information

Miyoshi et al. 10.1073/pnas.0912407107

## Optimization of Retroviral Transduction of Human Cancer Cell Lines

First, we introduced *Slc7a1* (mouse receptor gene) into human cancer cell lines with lentivirus to improve the transduction efficiency (6, 7). Second, we introduced several combinations of retroviruses into human cancer cell lines with *Slc7a1* (summarized in Table S1). According to the protocol summarized in Fig. 1A, eight days after transduction, cells were harvested by trypsinization and plated onto a Matrigel-coated plate (BD Biosciences, Bedford, MA) or mitomycin C-treated and provided feeder cells with mouse embryonic fibroblasts (MEF) (6, 7). The next day, the medium (DMEM with 10% FBS) was replaced with the medium suitable for the culture of ES cells, mTeSR1 medium (StemCell Technologies, Vancouver, BC), or MEF-conditioned maintenance medium. We first introduced green fluorescent protein (GFP) into cancer cell lines with amphotropic retrovirus produced in PLAT-A packaging cells. To assess the transfection efficiency, we introduced GFP or DsRed (Clontech, Palo Alto, CA) into cancer cell lines with ecotropic retrovirus produced in PLAT-E packaging cells. We manufactured a specific tool, GFP-*NANOG* promoter clone11, which contained a specific sequence in the promoter region for pluripotent-associated gene *NANOG*, and could detect the pluripotent state in a living cell on based on previous studies. GFP expressions of transfectants were visualized with all-in-one-type fluorescence microscopy (BZ-8000; Keyence, Osaka). To determine the differentiation ability of iPC cells, we transferred the

embryoid body (EB)-like structures to EB culture condition as gelatin-coated plates maintained in DMEM/F12 containing 20% knockout-certified serum replacement (KSR; Invitrogen, Carlsbad, CA), 2 mM L-glutamine, 100  $\mu$ M nonessential amino acids, 100  $\mu$ M 2-mercaptoethanol (Invitrogen), and 0.5% penicillin and streptomycin at 37 °C under a 5% humidified CO<sub>2</sub> atmosphere.

## Real-Time Reverse Transcription PCR (RT-PCR)

For quantitative assessments of PCR amplification products with various sizes, quantitative real-time RT-PCR using a LightCycler TaqMan Master Kit (Roche Diagnostics, Tokyo) for specific genes and *GAPDH* (Tables S2 and S3). The amplification protocol consisted of 35 cycles of denaturation at 95 °C for 10 s, and annealing and elongation at 60 °C for 30 s. If Universal Probe Library probe (Roche Diagnostics) was not selected with the specific primers of the target gene for PCR analysis of retroviral transgenes, quantitative real-time RT-PCR using a LightCycler FastStart DNA Master SYBR Green I kit was carried out (Roche Diagnostics). The amplification protocol consisted of denaturation at 95 °C for 10 s, annealing at 60 °C for 10 s, and elongation at 72 °C for 10 s. The products were then subjected to a temperature gradient of 55–95 °C with continuous fluorescence monitoring to produce a melting curve of the products. The expressions of mRNA copies were normalized against *GAPDH* mRNA expression.

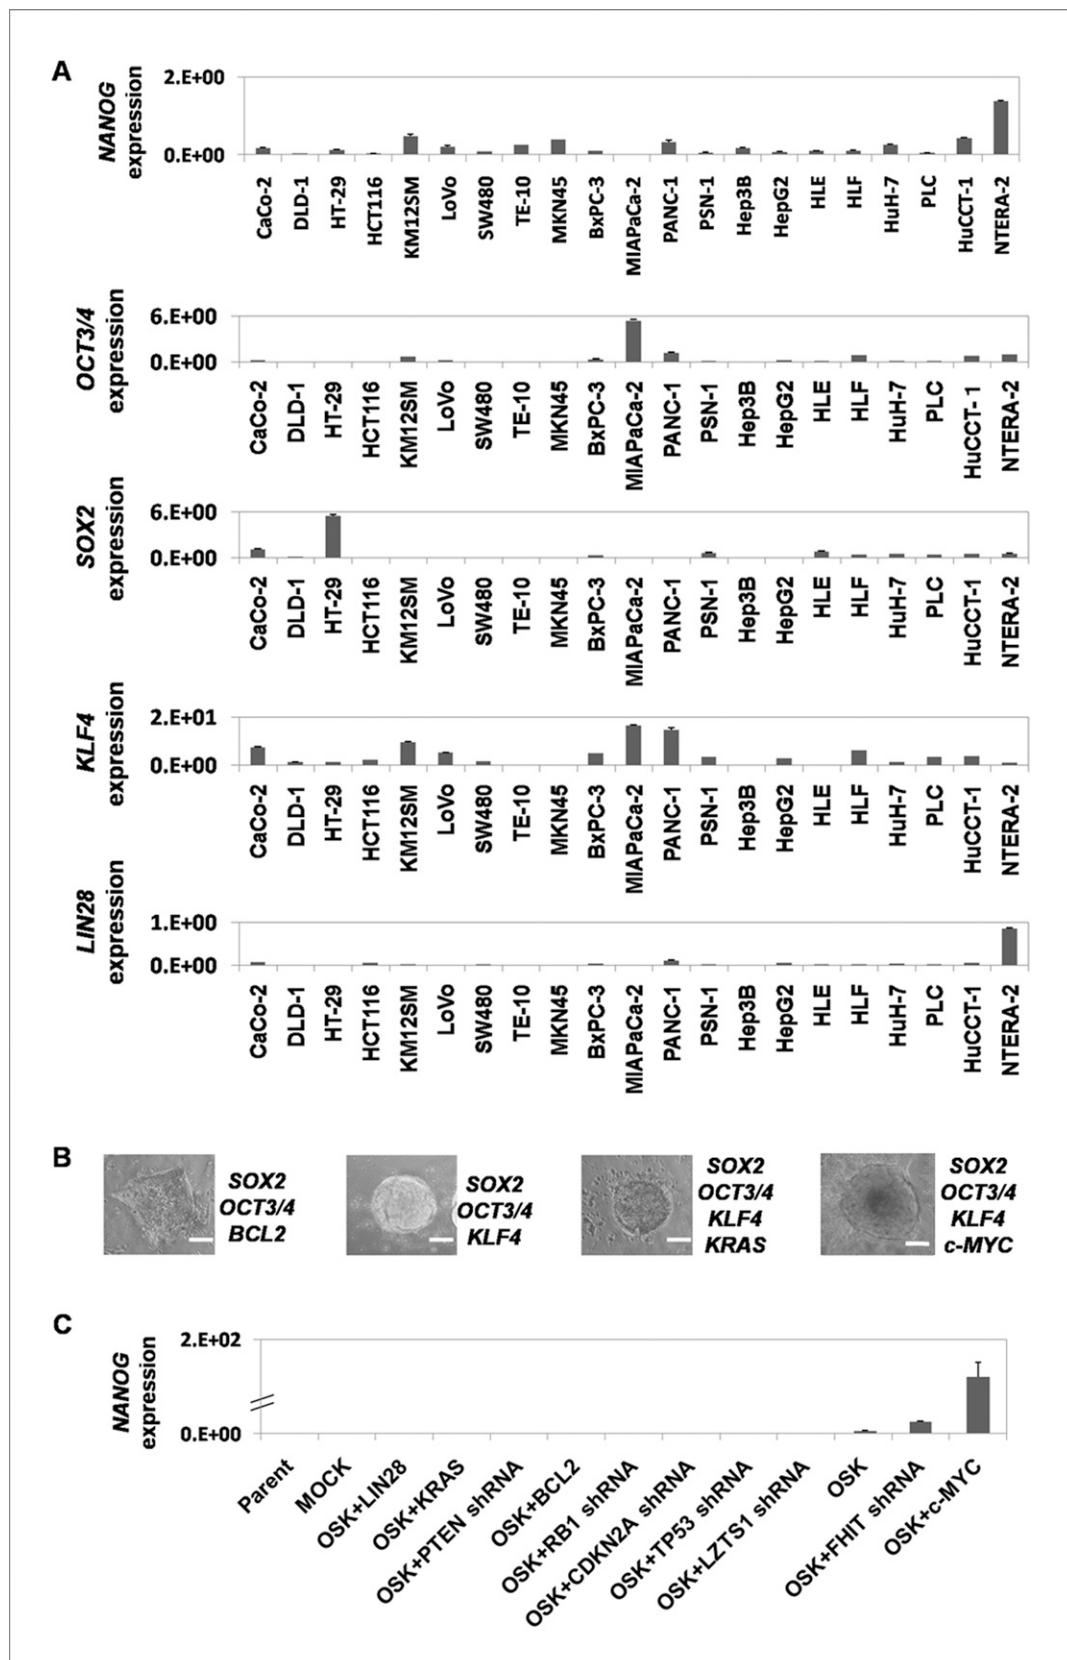

**Fig. S1.** Immature status of gastrointestinal cancer cell lines. (A) Real-time RT-PCR analysis showed *NANOG*, *OCT3/4*, *SOX2*, *KLF4*, and *LIN28* in 20 gastrointestinal cancer cell lines. The expression of *NANOG* mRNA is low in four cancer cell lines: DLD-1 and HCT116 (colorectal cancer), MIA PaCa-2 (pancreatic cancer), and PLC (hepatocellular carcinoma). (B) Immature status induced by combinations of several defined factors was shown by the morphology of DLD-1. (C) Real-time RT-PCR analysis of *NANOG* expression in cell line DLD-1 that was transfected by combinations of several defined factors. The expressions of mRNA copies were normalized against *GAPDH* mRNA expression.

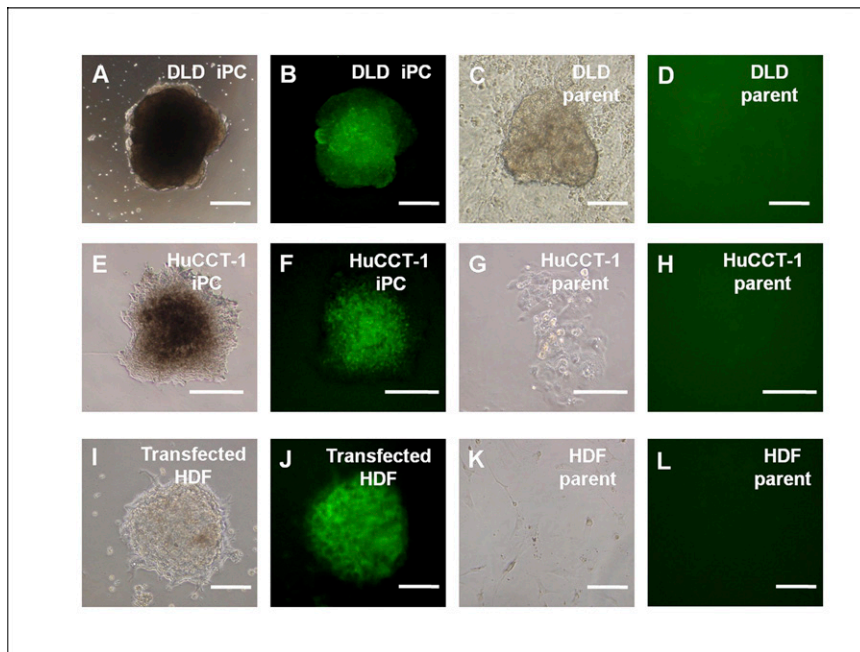

**Fig. S2.** Evaluation of *NANOG* promoter activity. *NANOG* promoter activity was evaluated by *GFP-NANOG* promoter clone11 in DLD-1, which was or was not induced. (A and B) Morphology and fluorography of *GFP* of DLD1-induced cells. (C and D) Morphology and fluorography of parental cells. (E–H) Morphology and fluorography of *GFP* of iPC cells (E and F) and those of parental cells (G and H) in HuCCT-1. (I–L) Morphology and fluorography of *GFP* of transfected HDF (I and J) and those of parental cells (K and L) in HDF. *GFP* expression of transfectants was visualized with all-in-one-type fluorescence microscopy (BZ-8000; Keyence, Osaka). Scale bars: 200  $\mu\text{m}$ . (Original magnification,  $\times 200$ )

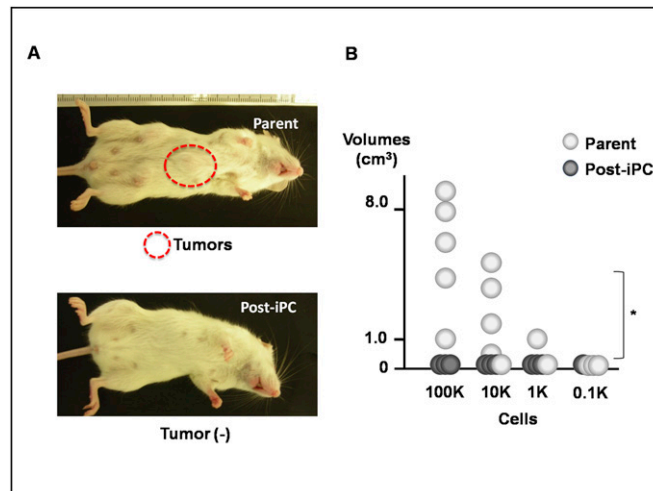

**Fig. S3.** In vivo analyses of proliferation assay. To determine proliferative properties in vivo, we s.c. transplanted differentiated iPC cells at several concentrations into the dorsal flanks of NOD/SCID mice. (A) Four weeks after injection, mice were killed and observed for tumor formation. (B) Significant differences of tumorigenesis between PostiPC and parental cancer cells ( $n = 5$ , \*,  $P < 0.01$ , Wilcoxon rank test).

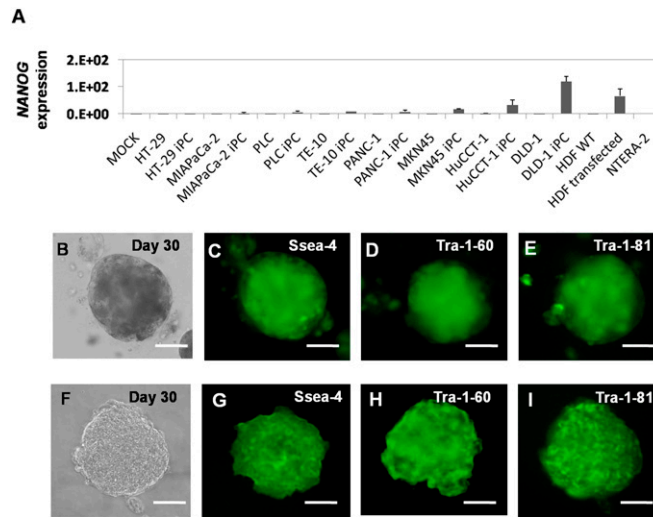

**Fig. S4.** iPC cells from several gastrointestinal cancers. (A) Real-time RT-PCR analysis of *NANOG* mRNA expressions in eight iPC cells lines (colorectal cancer, DLD-1 and HT-29; esophageal cancer, TE-10; gastric cancer, MKN45; pancreatic cancers, MIAPaCa-2 and PANC-1; hepatocellular carcinoma, PLC; cholangiocellular carcinoma, HuCCT-1). Transfected HDF and NTERA-2 were used as references for *NANOG* expression. The expressions of *NANOG* mRNA copies were normalized against *GAPDH* mRNA expression. (B–I) iPC cells from PLC and HuCCT-1 were analyzed for surface antigens, phase contrast (B and F), Ssea-4 (C and G), Tra-1-60 (D and H), and Tra-1-81 (E and I).

**Table S1. Plasmid used for transfection**

| Name                                      | Type       | Company         | Product No.       |
|-------------------------------------------|------------|-----------------|-------------------|
| pMIG Bcl-2                                | Retrovirus | Addgene         | 8793              |
| pMXs-hOCT3/4                              | Retrovirus | Addgene         | 17217             |
| pMXs-hSOX2                                | Retrovirus | Addgene         | 17218             |
| pMXs-hKLF4                                | Retrovirus | Addgene         | 17219             |
| pMXs-hc-MYC                               | Retrovirus | Addgene         | 17220             |
| pBabe K-Ras 12V                           | Retrovirus | Addgene         | 12544             |
| pSin-EF2-Nanog-Pur                        | Lentivirus | Addgene         | 16578             |
| pSin-EF2-LIN28-Pur                        | Lentivirus | Addgene         | 16580             |
| pLenti6/Ubc/mSlc7a1                       | Lentivirus | Addgene         | 17224             |
| pRetroQ-DsRed Monomer-C1                  | Retrovirus | Clontech        | 632508            |
| pMXs Retroviral Vector (negative control) | Retrovirus | Cell Biolabs    | RTV-010           |
| NM_000546 shRNAmir                        | Lentivirus | Open Biosystems | RHS4430-99365288  |
| NM_000077 shRNAmir                        | Lentivirus | Open Biosystems | RHS4696-99703685  |
| NM_000314 shRNAmir                        | Lentivirus | Open Biosystems | RHS4740-NM_000314 |
| NM_002012 shRNAmir                        | Lentivirus | Open Biosystems | RHS4740-NM_002012 |
| NM_000321 shRNAmir                        | Lentivirus | Open Biosystems | RHS4531-NM_000321 |
| NM_021020 shRNAmir                        | Lentivirus | Open Biosystems | RHS4740-NM_021020 |

**Table S2. Primer sequences corresponding to universal probe libraries (UPL)**

| Primer     | Sequence 5'-3'                    | UPL No. | Applications  |
|------------|-----------------------------------|---------|---------------|
| hNANOG-S   | ATG CCT CAC ACG GAG ACT GT        | 66      | NANOG RT-PCR  |
| hNANOG-AS  | AGG GCT GTC CTG AAT AAG CA        |         |               |
| hREX1-S    | TCT GAG TAC ATG ACA GGC AAG AA    | 65      | REX1 RT-PCR   |
| hREX1-AS   | TCT GAT AGG TCA ATG CCA GGT       |         |               |
| hOCT3/4-S  | AGC AAA ACC CGG AGG AGT           | 35      | OCT3/4 RT-PCR |
| hOCT3/4-AS | CCA CAT CGG CCT GTG TAT ATC       |         |               |
| hSOX2-S    | CTC CGG GAC ATG ATC AGC           | 70      | SOX2 RT-PCR   |
| hSOX2-AS   | CTG GGA CAT GTG AAG TCT GC        |         |               |
| hKLF4-S    | ATT GGA CCC GGT GTA CATT C        | 66      | KLF4 RT-PCR   |
| hKLF4-AS   | AGC ACG AAC TTG CCC ATC           |         |               |
| hc-MYC-S   | CAC CAG CAG CGA CTC TGA           | 34      | c-MYC RT-PCR  |
| hc-MYC-AS  | GAT CCA GAC TCT GAC CTT TTG C     |         |               |
| hGAPDH-S   | AGC CAC ATC GCT CAG ACA C         | 60      | GAPDH RT-PCR  |
| hGAPDH-AS  | GCC CAA TAC GAC CAA ATC C         |         |               |
| hLIN28-S   | CTG TCC AAA TGC AAG TGA GG        | 79      | LIN28 RT-PCR  |
| hLIN28-AS  | GCA GGT TGT AGG GTG ATT CC        |         |               |
| hKRT19-S   | GTC ATG GCC GAG CAG AAC           | 89      | KRT19 RT-PCR  |
| hKRT19-AS  | CCG GTT CAA TTC TTC AGT CC        |         |               |
| hCDH1-S    | CCC GGG ACA ACG TTT ATT A         | 35      | CDH1 RT-PCR   |
| hCDH1-AS   | GCT GGC TCA AGT CAA AGT CC        |         |               |
| hVIM-S     | AAA GTG TGG CTG CCA AGA AC        | 16      | VIM RT-PCR    |
| hVIM-AS    | AGC CTC AGA GAG GTC AGC AA        |         |               |
| hFABP4-S   | GGA TGA TAA ACT GGT GGT GGA       | 85      | FABP4 RT-PCR  |
| hFABP4-AS  | CAC AGA ATG TTG TAG AGT TCA ATG C |         |               |
| hMAP2-S    | GCT CAA CAT AAA GAC CAG ACT GC    | 13      | MAP2 RT-PCR   |
| hMAP2-AS   | TGG AGA AGG AGG CAG ATT AGC       |         |               |
| hPAX6-S    | TCA CCA TGG CAA ATA ACC TG        | 20      | PAX6 RT-PCR   |
| hPAX6-AS   | CAG CAT GCA GGA GTA TGA GG        |         |               |
| hTP16-S    | GTG GAC CTG GCT GAG GAG           | 34      | CDKN2A RT-PCR |
| hTP16-AS   | CTT TCA ATC GGG GAT GTC TG        |         |               |
| hTP53-S    | CCC CAG CCA AAG AAG AAA C         | 58      | TP53 RT-PCR   |
| hTP53-AS   | AAC ATC TCG AAG CGC TCA C         |         |               |
| hDNMT3A-S  | TGG TGC ACT GAA ATG GAA AG        | 48      | DNMT3A RT-PCR |
| hDNMT3A-AS | GCT CAT GTT GGA GAC GTC AG        |         |               |
| hDNMT3B-S  | AGA GGG ACA TCT CAC GGT TC        | 84      | DNMT3B RT-PCR |
| hDNMT3B-AS | GGT TGC CCC AGA AGT ATC G         |         |               |

**Table S3. Primer sequences for specific applications**

| Primer           | Sequence 5'-3'                        | Applications                 |
|------------------|---------------------------------------|------------------------------|
| hOCT3/4-ChIP-S2  | TTG CCA GCC ATT ATC ATT CA            | OCT3/4 ChIP                  |
| hOCT3/4-ChIP-AS2 | TAT AGA GCT GCT GCG GGA TT            |                              |
| hNANOG-ChIP-S2   | GAT TTG TGG GCC TGA AGA AA            | NANOG ChIP                   |
| hNANOG-ChIP-AS2  | GGA AAA AGG GGT TTC CAG AG            |                              |
| hSOX2-ChIP-S1    | GAG AAG GGC GTG AGA GAG TG            | SOX2 ChIP                    |
| hSOX2-ChIP-AS1   | AAA CAG CCA GTG CAG GAG TT            |                              |
| hPAX6-ChIP-S1    | TTG TGT GAG AGC GAG CGG TGC ATT TG    | PAX6 ChIP                    |
| hPAX6-ChIP-AS1   | CAC CGC TCC TCA CTG GCC CAT TAG C     |                              |
| hMSX2-ChIP-S1    | TTC TGG CGG TAG AGG GAG AGT GGG ATG G | MSX2 ChIP                    |
| hMSX2-ChIP-AS1   | ATC ACG CCG AAA CTG AAA AGC CCG AGA C |                              |
| mehNANOG-F1-S1   | TGG TTA GGT TGG TTT TAA ATT TTT G     | Bisulfite sequencing         |
| mehNANOG-F1-AS1  | AAC CCA CCC TTA TAA ATT CTC AAT TA    |                              |
| hOCT3/4-pl       | CCA CAT CGG CCT GTG TAT ATC           | OCT3/4 Tg genomic and RT-PCR |
| hSOX2-pl         | TTC TCC CCC CTC CAG TTC G             | SOX2 Tg genomic and RT-PCR   |
| hKLF4-pl         | GAC GCC TTC AGC ACG AAC               | KLF4 Tg genomic and RT-PCR   |
| hc-MYC-pl        | GAT CCA GAC TCT GAC CTT TTG C         | c-MYC Tg genomic and RT-PCR  |
| hGAPDH-S1        | TTG GTA TCG TGG AAG GAC TCA           | GAPDH PCR                    |
| hGAPDH-AS1       | TGT CAT CAT ATT GGC AGG TT            |                              |
